# Supplementary material for: Harnessing region-specific neurovascular signaling to promote germinal matrix vessel maturation and hemorrhage prevention
Source: PubMed Central journal article supplement (PMC6899033; doi:10.1242/dmm.041228), 2019-10-10
Supplement: dmm-12-041228-s1.pdf [file dmm-12-041228-s1.pdf]

## Supplemental Figures

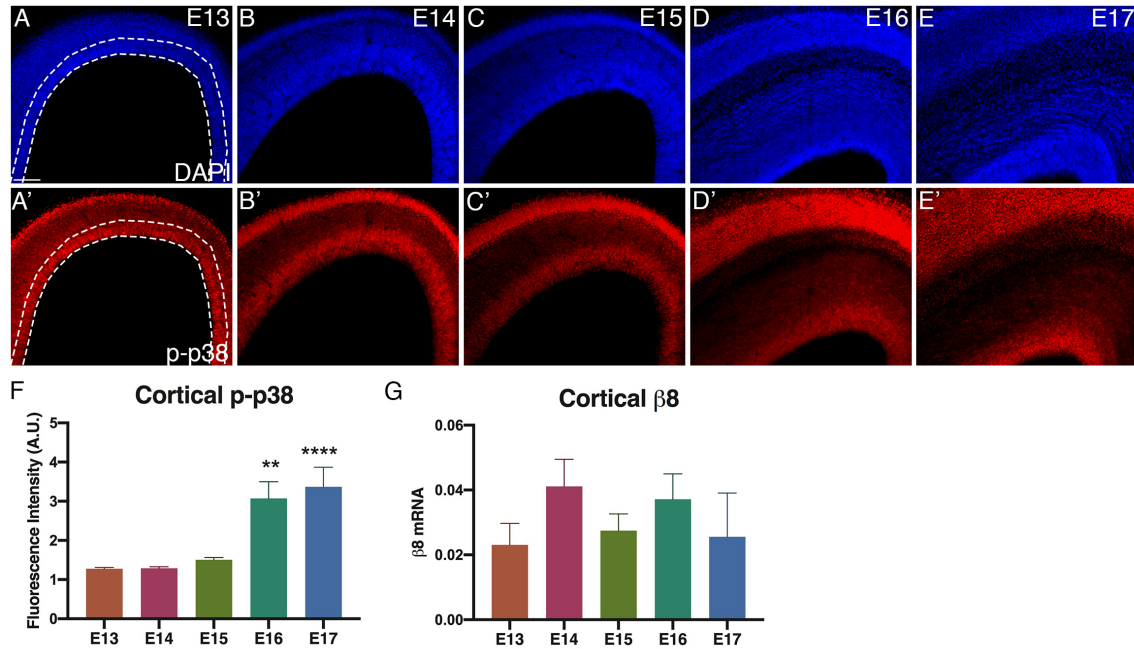

### Figure S1: Endogenous cortical GPCR-β8 signaling dynamics during development

(A-E) DAPI images of cortex from embryonic day 13 (E13) to E17.

(A'-E') Phospho-p38 (p-p-38) staining of cortex from E13-E17.

(F) Quantification of immunofluorescence of phospho-p38 staining. (E13: n = 5; E14: n = 10, E15: n = 12, E16: n = 3, E17: n = 7;  $p = 0.0032, 0.0001$ )

(G) Quantitative PCR (q-PCR) of integrin β8 gene expression from E13.5 E17.5 in the cortex.

(E13: n = 8; E14: n = 7, E15: n = 5, E16: n = 7, E17: n = 4)

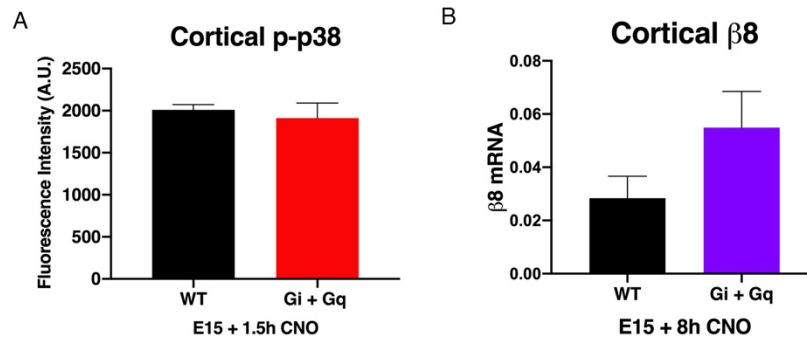

**Figure S2: DREADD activation at E15 does not induce  $\beta 8$  pathway in the cortex**

(A) Quantification of p-p38 cortical staining in WT and Gi+Gq brains 1.5 hours after CNO injection at E15 (ctl: n=9, Gi+Gq: n=7)

(B) q-PCR of integrin  $\beta 8$  gene expression 8 hours after CNO injection at E15 in wild type and Gi+Gq brains (ctl: n=5, Gi+Gq: n=4).

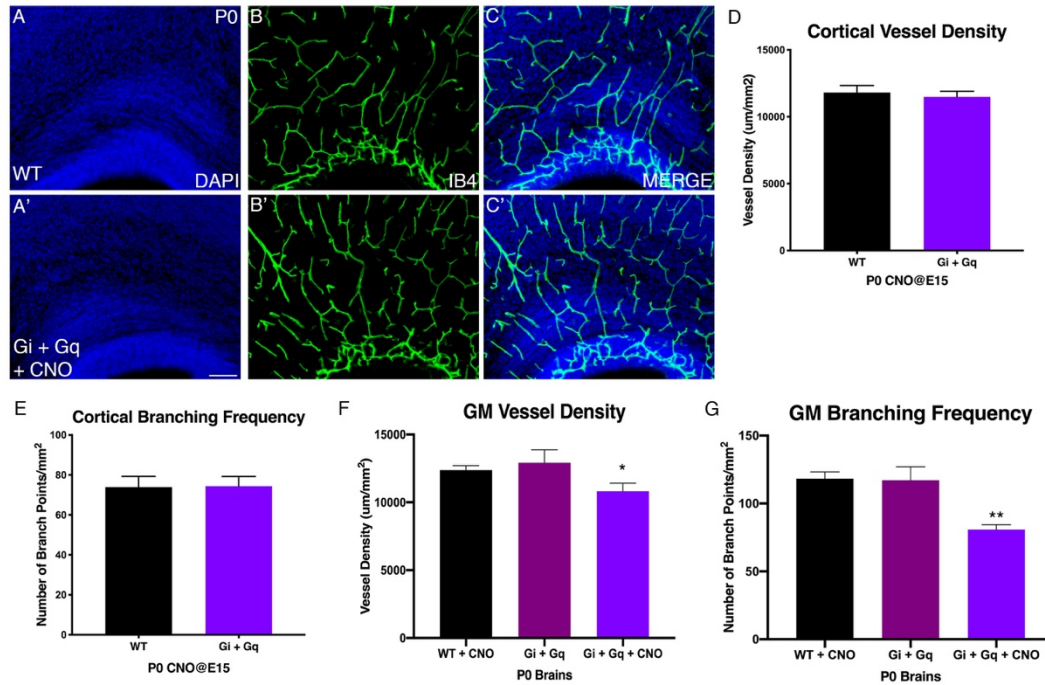

### Figure S3: Cortical vessel morphology is not affected by E15 DREADD activation

(A-A') DAPI staining of cortex of wild type and Gi+Gq P0 brains after CNO injection at E15.

(B-B') IB4 staining of cortical vessels in wild type and Gi+Gq P0 brains after CNO injection at E15.

(C-C') DAPI and IB4 merge

(D-E) Quantification of cortical vessel density (WT+CNO: *n* = 6, Gi+Gq+CNO: *n* = 7; *p* = 0.65)

(D) and branching frequency (WT+CNO: *n* = 6, Gi+Gq+CNO: *n* = 7; *p* = 0.32) (E) in wild type and Gi+Gq after 1 mg/kg CNO injection at E15.

(F-G) Quantification of GM vessel density in WT + CNO (*n* = 21), Gi+Gq without CNO (*n* = 14), and Gi+Gq + CNO (*n* = 13; *p* = 0.002) (F) and branching frequency WT + CNO (*n* = 21), Gi+Gq without CNO (*n* = 14), and Gi+Gq + CNO (*n* = 13; *p* = 0.0004) (G) in wild type and Gi+Gq brains after a single injection of 1 mg/kg of CNO at E15.

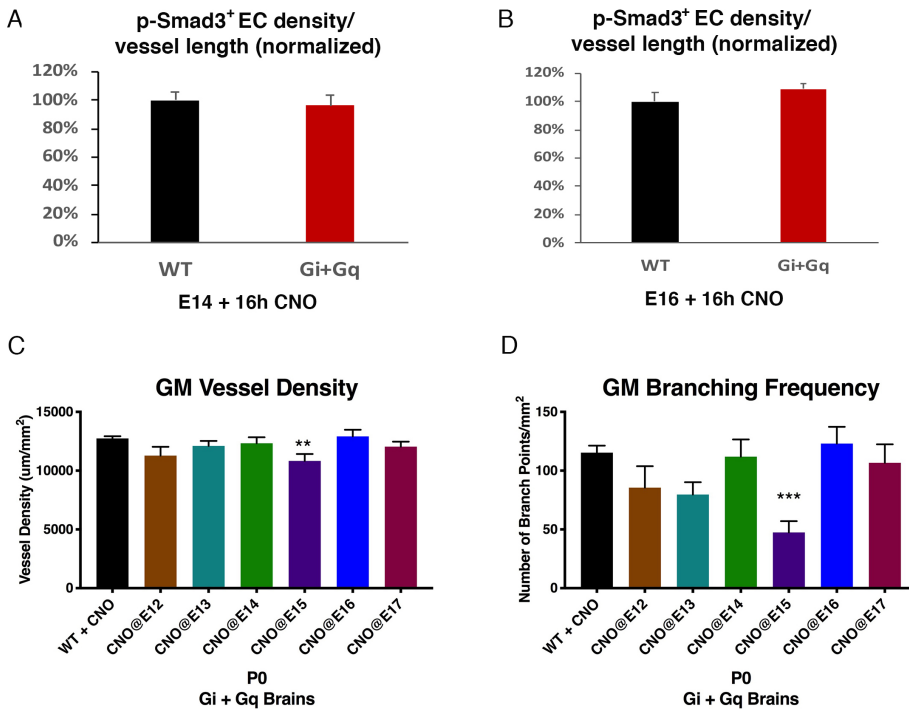

**Figure S4: CNO injection at various developmental stages shows only E15 activation has effects on GM vessel morphology**

(A) Quantification of phospho-Smad3-positive ECs along vessels in the GM 16 hours after CNO injection at E14 in wild type and Gi+Gq brains.

(B) Quantification of phospho-Smad3-positive ECs along vessels in the GM 16 hours after CNO injection at E16 in wild type and Gi+Gq brains.

(C) Quantification of vessel density in GM at P0 after single injection of CNO at one developmental stage in wild type and Gi+Gq expressing brains (E11-E17).

(D) Quantification of vessel branching in GM at P0 after single injection of CNO at one developmental stage in wild type and Gi+Gq expressing brains (E11-E17).

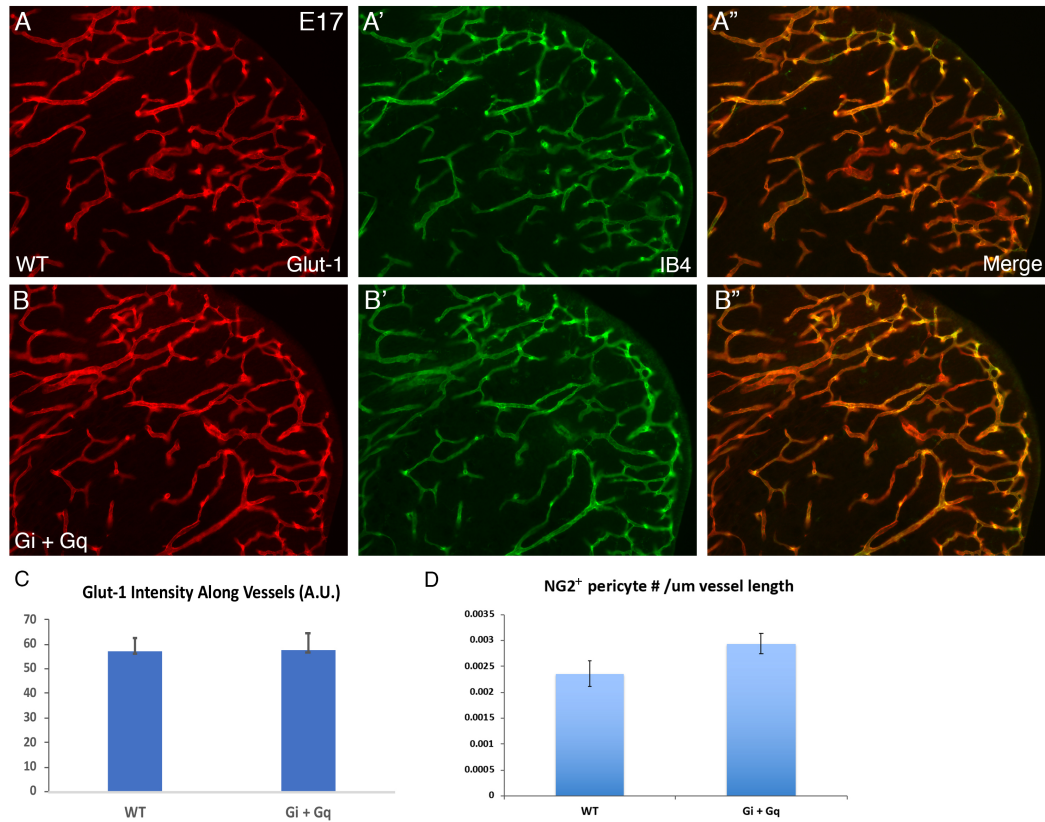

**Figure S5. 0.75x CNO injection at E15 does not significantly affect Glut-1 expression or pericyte density.**

(A-B'') Glut-1 and IB4 staining of GM vessels in wild type (A-A'') and Gi+Gq (B-B'') E17 brains after 0.75x CNO injection at E15.

(C) Quantification of Glut-1 intensity along vessels in the GM at E17 after 0.75x CNO injection at E15 in wild type and Gi+Gq animals ( $p = 0.94$ ;  $n = 8$ ).

(D) Quantification of NG2-positive pericytes along vessels in the GM at E17 after 0.75x CNO injection at E15 in wild type and Gi+Gq animals ( $p = 0.10$ ;  $n = 7$ ).

**Table S1. Resources and reagents**

| REAGENT or RESOURCE                  | SOURCE                                    | IDENTIFIER                                                              |
|--------------------------------------|-------------------------------------------|-------------------------------------------------------------------------|
| <b>Antibodies</b>                    |                                           |                                                                         |
| Rabbit anti-laminin                  | Sigma-Aldrich                             | Cat # L9393;<br>RRID: AB_477163                                         |
| Biotinylated Isolectin B4            | Vector<br>Laboratories                    | Cat # B-1205;<br>RRID: AB_2314661                                       |
| Rat anti-Ter119                      | BD Pharmingen                             | Cat # 553986;<br>RRID: AB_2650605                                       |
| Rabbit anti-Phospho-p38              | Cell Signaling                            | Cat # 4511;<br>RRID: AB_2139682                                         |
| Rabbit anti-Collagen IV              | Abcam<br>Bio-Rad                          | Cat# ab15633,<br>RRID: AB_302010<br>Cat # 2150-1470<br>RRID: AB_2082660 |
| Rabbit anti-GFAP                     | Dako                                      | Cat # Z 0334;<br>RRID: AB_10013382                                      |
| Rabbit anti-Glut1                    | Thermo Scientific                         | Cat# RB-9052-P0;<br>RRID: AB_177894                                     |
| FITC conjugated secondary antibodies | Jackson<br>ImmunoResearch<br>Laboratories | Cat # 111-095-003;<br>RRID: AB_2337972                                  |
| Cy3 conjugated secondary antibodies  | Jackson<br>ImmunoResearch<br>Laboratories | Cat # 711-165-152;<br>RRID: AB_2307443<br>Cat # 111-165-144;            |

|                                                          |                                           |                                                                        |
|----------------------------------------------------------|-------------------------------------------|------------------------------------------------------------------------|
|                                                          |                                           | RRID: AB_2338006                                                       |
| FITC conjugated streptavidin                             | Jackson<br>ImmunoResearch<br>Laboratories | Cat # 016-010-084;<br>RRID: AB_2337236                                 |
| Peroxidase conjugated<br>secondary<br>antibodies         | Santa Cruz<br>Biotech                     | Cat # SC-2004;<br>RRID: AB_631746<br>Cat # SC-2005;<br>RRID: AB_631736 |
| <b>Chemicals, Peptides, and<br/>Recombinant Proteins</b> |                                           |                                                                        |
| S1P                                                      | Cayman Chemical                           | Cat # 62570                                                            |
| JTE-013                                                  | Cayman Chemical                           | Cat # 10009458                                                         |
| TY 52156                                                 | Tocris                                    | Cat # 5328                                                             |
| CNO                                                      | APExBIO<br>Tocris                         | Cat #: A3317<br>Cat #: 4936                                            |
|                                                          |                                           |                                                                        |
| <b>Critical Commercial Assays</b>                        |                                           |                                                                        |
| Tyramide signal amplification<br>(TSA) plus Cy3 kit      | PerkinElmer,<br>Waltham, MA               | Cat # NEL744E001KT                                                     |
| GoTaq qPCR master mix                                    | Promega                                   | Cat # A6002 #TM318                                                     |
| <b>Experimental Models:<br/>Organisms/Strains</b>        |                                           |                                                                        |

|                                                                                |             |                                       |
|--------------------------------------------------------------------------------|-------------|---------------------------------------|
| Ric8a conditional allele                                                       | Our own lab | Ma et al., 2012 (40)                  |
| S1pr1 conditional allele                                                       | JAX         | JAX: 019141<br>Allende et al., 2003   |
| Nestin-cre                                                                     | JAX         | JAX: 003771<br>Tronche et al., 1999   |
| ROSA:LNL:tTA                                                                   | JAX         | JAX: 011008<br>Wang et al., 2008      |
| TRE-hM3Dq                                                                      | JAX         | JAX: 014093<br>Alexander et al., 2009 |
| TRE-hM4Di                                                                      | JAX         | JAX: 024114                           |
|                                                                                |             |                                       |
| <b>Oligonucleotides</b>                                                        |             |                                       |
| GAPDH: F-tgcccccatgtttgtgatg,<br>R- tgtggatcatgagcccttc                        | Our own lab |                                       |
| integrin $\beta$ 8: F-<br>ccagtactgtgagaaggatgac, R-<br>agttgacacagtgctgtgctga | Our own lab |                                       |
| integrin $\beta$ 3: F-<br>tggagacacctgtgtgagaag, R-<br>ttcacctgctgatgcatc      | Our own lab |                                       |
| integrin $\beta$ 5: F-<br>tctgcttcgagagtgagtt, R-<br>ttctccacagtgacactctcc     | Our own lab |                                       |
| integrin $\alpha$ : F-<br>gagtacttctcgggtggtcct, R-<br>ggggggctccaataaacaca    | Our own lab |                                       |



|                                                                |                            |  |
|----------------------------------------------------------------|----------------------------|--|
| Nestin: F-<br>cgctcagatcctggaaggtg, R-<br>ttctcagcctccagcagagt | Our own lab, this<br>paper |  |
|                                                                |                            |  |
| <b>Software and Algorithms</b>                                 |                            |  |
| ImageJ                                                         |                            |  |
